RESEARCH ARTICLE

# Red cell distribution width (RDW) is independently associated with all-cause mortality in adult patients with osteomyelitis admitted to the intensive care unit

Likai Liang<sup>1</sup>, Zhe Chen<sup>1</sup>, Zongyun He<sup>1</sup>, Haibing Tao<sup>1</sup>, Yang Chen<sup>2</sup>, Tao Liu<sup>1\*</sup>

**1** Department of Hand and Foot Surgery, Yiwu Central Hospital, Yiwu, China, **2** Liverpool Centre for Cardiovascular Science at University of Liverpool, Liverpool John Moores University and Liverpool Heart and Chest Hospital, Liverpool, United Kingdom

\* [liutao5467@163.com](mailto:liutao5467@163.com)

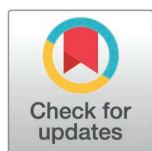

## OPEN ACCESS

**Citation:** Liang L, Chen Z, He Z, Tao H, Chen Y, Liu T (2025) Red cell distribution width (RDW) is independently associated with all-cause mortality in adult patients with osteomyelitis admitted to the intensive care unit. PLoS One 20(9): e0332211. <https://doi.org/10.1371/journal.pone.0332211>

**Editor:** Amin Mansoori, Ferdowsi University of Mashhad, IRAN, ISLAMIC REPUBLIC OF

**Received:** November 8, 2023

**Accepted:** August 27, 2025

**Published:** September 16, 2025

**Copyright:** © 2025 Liang et al. This is an open access article distributed under the terms of the [Creative Commons Attribution License](https://creativecommons.org/licenses/by/4.0/), which permits unrestricted use, distribution, and reproduction in any medium, provided the original author and source are credited.

**Data availability statement:** The data underlying the results presented in this study are available from the MIMIC-IV repository, accessible at <https://physionet.org/content/mimiciv/2.0/>. The MIMIC-IV repository imposes certain restrictions on data access to protect

## Abstract

### Objective

This study aims to investigate the correlation between red cell distribution width (RDW) and overall mortality in adults diagnosed with osteomyelitis.

### Methods

In this retrospective study, we examined data from the Medical Information Mart for Intensive Care IV (MIMIC-IV) database, comprising 2,700 patients with osteomyelitis and available RDW data on the initial day of admission. Employing Kaplan-Meier survival analysis, we assessed the incidence rate of primary outcome events among groups categorized by RDW levels (Q1:  $RDW \leq 13.5$ , Q2:  $13.5 < RDW \leq 14.6$ , Q3:  $14.6 < RDW \leq 16.1$ , Q4:  $16.1 < RDW$ ), with differences evaluated using the Log-rank test. Subsequently, Cox proportional hazards analyses were conducted to investigate the correlation between RDW and the overall mortality risk. Additionally, we performed stratified analyses based on factors such as gender, congestive heart failure, diabetes, and myocardial infarction to scrutinize the consistency of RDW's prognostic significance.

### Results

Over the 90-day follow-up, 10.7% of patients with osteomyelitis succumbed. Unadjusted RDW correlated significantly with in-hospital, 30-day, and 90-day mortality ( $p < 0.05$ ). Higher RDW levels proved more effective in predicting increased risks. RDW emerged as an independent prognostic indicator, showing no significant interactions with sex, congestive heart failure, diabetes, and myocardial infarction (interaction  $p$ -values: 0.254 to 0.920).

patient privacy, and it is managed by PhysioNet under the oversight of the Massachusetts Institute of Technology (MIT) and the Beth Israel Deaconess Medical Center. To access the data associated with this manuscript, users must: • Register as a credentialed user on the PhysioNet repository website. • Complete the required Collaborative Institutional Training Initiative (CITI) training for "Data or Specimens Only Research." • Sign the MIMIC-IV Data Use Agreement for the project. Once these prerequisites have been met, access to the data contained in the MIMIC-IV repository will be granted. In this study, Yang Chen has registered as a certified user of PhysioNet, completed the required CITI Programme training (certificate no. 53753450), and signed the Project Data Use Agreement. Additionally, our raw data has been submitted in the Supplementary Files section of this manuscript for reference. For readers who would like to request access to the data, please follow the instructions outlined on the MIMIC-IV repository page linked above. Further assistance can be obtained by contacting PhysioNet support directly through their website.

**Funding:** The author(s) received no specific funding for this work.

**Competing interests:** The authors have declared that no competing interests exist.

## Conclusions

The noteworthy link between RDW and heightened all-cause mortality in patients with osteomyelitis who were hospitalized in the intensive care unit highlights RDW's potential as a valuable marker for identifying at-risk individuals during hospitalization.

## Introduction

Osteomyelitis, a challenging infectious bone condition, poses difficulties for health-care professionals and patients alike. The incidence is 21.8 cases per 100,000 person-years in the United States [1]. Osteomyelitis frequently arises as a complication of open fractures, internal fixation procedures, diabetic foot ulcers, or haematogenous bone infections. The primary anatomical locations for the occurrence of osteomyelitis are typically the tibia and femur [2]. In recent years, there has been a noticeable rise in the incidence of vertebral osteomyelitis. The overall mortality rate has been documented as high as 20%, with a notably heightened risk observed in the first year following diagnosis [3,4]. The diagnosis of osteomyelitis mainly depends on clinical manifestation, laboratory tests and imaging studies. In the early stage of the disease, clinical manifestations are often subtle, and imaging shows no obvious signs of infection, making early diagnosis challenging [5]. Inflammatory markers, such as interleukin-6 (IL-6), tumor necrosis factor-alpha (TNF- $\alpha$ ), procalcitonin (PCT), and C-reactive protein (CRP), serve as pivotal indicators in assessing the severity of osteomyelitis. These markers underscore the significant impact of inflammation levels on both the diagnostic and prognostic aspects of osteomyelitis [6,7]. Red cell distribution width (RDW), typically expressed as a percentage (%), is a parameter routinely evaluated in standard blood analyses. It serves as an indicator of the variability in the size of erythrocytes, and has long been used in the hematology laboratory to distinguish various types of anemia [8]. In recent years, numerous studies have highlighted the predictive potential of RDW in anticipating the occurrence or prognosis of various medical conditions. These encompass pneumonia, chronic obstructive pulmonary disease, myocardial infarction, stroke, drug-induced liver injury, Hodgkin's lymphoma, sepsis, fractures, anemia, brain death, cancer and other diseases [9–17]. Remarkably, the significance of RDW is increasingly recognized as a robust and independent predictor of mortality in the general population [18,19]. Perlstein et al. discovered a noteworthy correlation, indicating that a one-standard-deviation (1-SD) increase in RDW is associated with a 23% higher risk of all-cause mortality, a 28% higher risk of mortality due to cancer, and a 32% higher risk of mortality from chronic lower respiratory diseases. Importantly, these associations remained significant even after comprehensive adjustments for factors such as age, sex, race/ethnicity, and other variables [20].

Although RDW is a known prognostic factor in many diseases, its role in patients with osteomyelitis, especially those in the intensive care unit (ICU), has not been well studied. The association between RDW and overall mortality in adult patients with osteomyelitis admitted to the ICU remains to be elucidated. In this study, our

objective was to examine the association between RDW and overall mortality, and to assess the influence of RDW on the prognostic outcomes of patients with osteomyelitis admitted to the ICU.

## Methods

### Study population

This study represents a retrospective observational inquiry. Data for analysis was retrieved from an online international database known as the Medical Information Mart for Intensive Care IV (MIMIC-IV). The MIMIC-IV database comprises clinical information related to 454,324 patients admitted to the ICU at Beth Israel Deaconess Medical Center (BIDMC), Boston, USA, between 2008 and 2019. Upon successfully completing an examination and obtaining certification, access to this database is authorized. Author YC obtained the required permissions to access the dataset (Record ID 36328122) and took on the responsibility of extracting the data. The project received approval from the Institutional Review Boards of both the Massachusetts Institute of Technology and BIDMC. Additionally, a waiver for informed consent was granted.

We conducted a thorough analysis of data obtained from 5,437 patients (aged 18 years and older) with osteomyelitis (ICD-9code: 730.x; ICD-10: M90.9) who were admitted to MIMIC-IV. Patients without RDW data on the initial day of admission were excluded from the study. Furthermore, our analysis was confined to the initial hospital admission for patients whose hospital stay exceeded 24 hours. Patients with records of multiple hospital admissions were also excluded. The final study cohort consisted of a total of 2,700 patients with osteomyelitis, who were stratified into four groups according to the quartiles of their RDW values on the initial day of admission. The patient screening flow chart is presented in Fig 1.

### Variable extraction

The baseline characteristic data from the initial 24 hours of patients with osteomyelitis was retrieved from the MIMIC-IV database, including age, sex, race, comorbidities, laboratory results, interventions and clinical outcomes. The comorbidities included congestive heart failure (CHF), myocardial infarction (MI), peripheral vascular disease, cerebrovascular disease, chronic pulmonary disease, rheumatic disease, peptic ulcer disease, paraplegia, diabetes, liver disease, cancer and renal disease. Laboratory results included anion gap, sodium, potassium, calcium, creatinine, blood urea nitrogen, bicarbonate, chloride, glucose, hematocrit, red blood cell, mean red blood cell volume, mean corpuscular hemoglobin, white blood cell, platelet and hemoglobin. Interventions included mechanical ventilation, hemodialysis and vasopressor

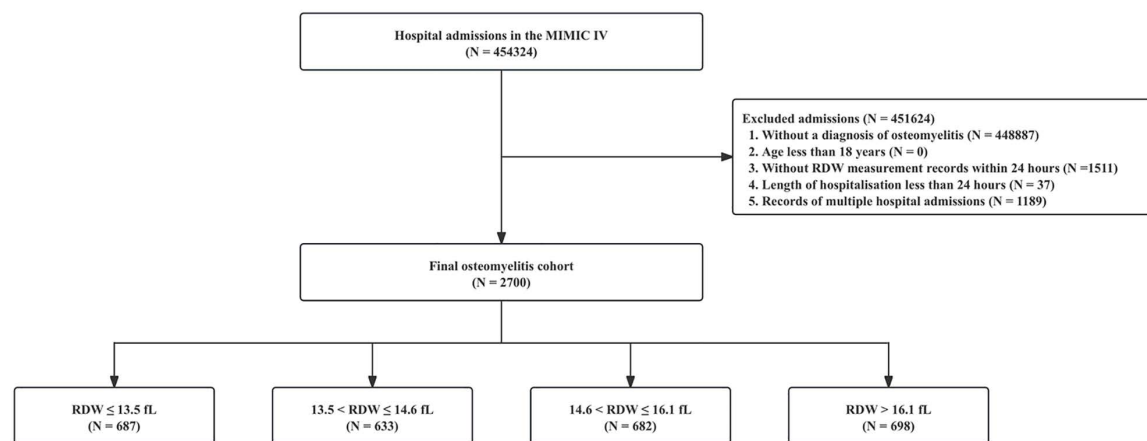

Fig 1. The patient screening flow chart.

<https://doi.org/10.1371/journal.pone.0332211.g001>

administration. Clinical outcomes included length of hospital stay, in-hospital mortality, 30-day post-admission mortality and 90-day post-admission mortality. If a variable was recorded more than once in the first 24 hours, we used its average value. The original data is presented in [S1 Table](#).

## Outcomes

The primary outcome of this study was in-hospital all-cause mortality. The secondary outcomes included 30-day and 90-day post-admission mortality.

## Statistical analysis

All statistical analyses were performed using R software (version 4.2.1) and SPSS (version 27). A two-sided  $p$ -value  $< 0.05$  was considered statistically significant. Group Stratification: Patients were divided into four groups according to the quartiles of RDW values measured on the first day of hospital admission. Quartile cut-off points were derived from the distribution of RDW in the study cohort. This stratification enables the comparison of outcomes across increasing RDW levels. Descriptive Statistics: Baseline characteristics were presented as mean  $\pm$  standard deviation (SD) or median with interquartile range (IQR) for continuous variables, and as counts with percentages for categorical variables. Comparisons of continuous variables between RDW quartile groups were performed using one-way ANOVA or Kruskal-Wallis test, depending on data normality. Categorical variables were compared using Chi-square test or Fisher's exact test when appropriate. These tests assess whether baseline characteristics and outcomes vary significantly across RDW levels. Survival Analysis: We used Kaplan–Meier survival curves to visualize survival probabilities across RDW quartile groups. Differences between groups were evaluated using the log-rank test. This non-parametric test determines whether the survival experiences of different groups are statistically different.

Multivariate Cox Proportional Hazards Models: To quantify the association between RDW and all-cause mortality (in-hospital, 30-day, and 90-day), we fitted Cox regression models. Results were expressed as hazard ratios (HRs) with 95% confidence intervals (CIs).

Model 1: Categorized red cell distribution width without adjustment.

Model 2: Model 1 adjusted by age, gender, race.

Model 3: Model 2 additionally adjusted for comorbidities (CHF, MI, peripheral vascular disease, cerebrovascular disease, chronic pulmonary disease, rheumatic disease, peptic ulcer disease, paraplegia, diabetes, liver disease, cancer, renal disease) and interventions (mechanical ventilation, hemodialysis and vasopressor administration).

Subgroup and Interaction Analysis: Stratified Cox regression was performed based on variables including gender, CHF, diabetes, and MI to assess the consistency of RDW's prognostic value. Interaction terms were included to test for effect modification.

Predictive Performance Evaluation: To assess the discriminatory power of RDW, we constructed Receiver Operating Characteristic (ROC) curves and calculated the Area Under the Curve (AUC) for each mortality outcome. AUC values of 0.7–0.8, 0.8–0.9, and  $> 0.9$  indicate acceptable, excellent, and outstanding discrimination, respectively.

Non-linear Relationship Assessment: We applied Restricted Cubic Spline (RCS) regression to model the potential non-linear association between RDW and mortality risk. This method provides a smoothed estimate of the risk relationship and helps detect thresholds or non-linear patterns that linear models may miss.

## Results

### Baseline characteristics and clinical outcomes

The baseline characteristics and clinical outcomes of patients with osteomyelitis are presented in [Table 1](#). A total of 2700 patients were included: 1,748 (64.7%) were female and 952 (35.3%) were male, with a mean age of 72.52 years; 1942

**Table 1. Baseline characteristics and clinical outcomes of patients with osteomyelitis.**

| Characteristics                              | All                     | Q1                      | Q2                      | Q3                      | Q4                      | p-value      |
|----------------------------------------------|-------------------------|-------------------------|-------------------------|-------------------------|-------------------------|--------------|
| <b>N</b>                                     | 2700                    | 687                     | 633                     | 682                     | 698                     |              |
| <b>Age (years)</b>                           | 63.33 ± 15.03           | 59.51 ± 15.39           | 62.59 ± 15.06           | 65.13 ± 14.76           | 66.00 ± 14.08           | < 0.001; *** |
| <b>Male, n (%)</b>                           | 1748 (64.7)             | 490 (71.3)              | 416 (65.7)              | 438 (64.2)              | 404 (57.9)              | < 0.001; *** |
| <b>Race, n (%)</b>                           |                         |                         |                         |                         |                         | 0.920        |
| <b>White</b>                                 | 1942 (71.9)             | 494 (71.9)              | 454 (71.1)              | 497 (72.9)              | 497 (71.2)              |              |
| <b>Non-white</b>                             | 758 (28.1)              | 193 (28.1)              | 179 (28.3)              | 185 (27.1)              | 201 (28.8)              |              |
| <b>Comorbidities, n (%)</b>                  |                         |                         |                         |                         |                         |              |
| <b>Congestive heart failure</b>              | 690 (25.6)              | 72 (10.5)               | 109 (17.2)              | 196 (28.7)              | 313 (44.8)              | < 0.001; *** |
| <b>Myocardial infarction</b>                 | 326 (12.1)              | 42 (6.1)                | 68 (10.7)               | 96 (14.1)               | 120 (17.2)              | < 0.001; *** |
| <b>Peripheral vascular disease</b>           | 665 (24.6)              | 146 (21.3)              | 153 (24.2)              | 164 (24.0)              | 202 (28.9)              | 0.010; **    |
| <b>Cerebrovascular disease</b>               | 194 (7.2)               | 29 (4.2)                | 45 (7.1)                | 55 (8.1)                | 65 (9.3)                | 0.002; **    |
| <b>Chronic pulmonary disease</b>             | 471 (17.4)              | 82 (11.9)               | 89 (14.1)               | 138 (20.2)              | 162 (23.2)              | < 0.001; *** |
| <b>Rheumatic disease</b>                     | 102 (3.8)               | 10 (1.5)                | 18 (2.8)                | 35 (5.1)                | 39 (5.6)                | < 0.001; *** |
| <b>Peptic ulcer disease</b>                  | 41 (1.5)                | 2 (0.3)                 | 10 (1.6)                | 10 (1.5)                | 19 (2.7)                | 0.003; **    |
| <b>Paraplegia</b>                            | 141 (5.2)               | 15 (2.2)                | 29 (4.6)                | 36 (5.3)                | 61 (8.7)                | < 0.001; *** |
| <b>Diabetes</b>                              | 1571 (58.2)             | 399 (58.1)              | 366 (57.8)              | 385 (56.5)              | 421 (60.3)              | 0.536        |
| <b>Liver disease</b>                         | 268 (9.9)               | 45 (6.6)                | 57 (9.0)                | 75 (11.0)               | 91 (13.0)               | < 0.001; *** |
| <b>Cancer</b>                                | 134 (5.0)               | 18 (2.6)                | 24 (3.8)                | 39 (5.7)                | 53 (7.6)                | < 0.001; *** |
| <b>Renal disease</b>                         | 901 (33.4)              | 148 (21.5)              | 172 (27.2)              | 238 (34.9)              | 343 (49.1)              | < 0.001; *** |
| <b>Laboratory results</b>                    |                         |                         |                         |                         |                         |              |
| <b>Anion gap (%)</b>                         | 15.00 (13.00, 17.00)    | 15.00 (13.00, 17.00)    | 15.00 (13.00, 17.00)    | 15.00 (13.00, 17.00)    | 15.00 (13.00, 18.00)    | < 0.001; *** |
| <b>Sodium (mmol/L)</b>                       | 138.00 (135.00, 140.00) | 138.00 (135.00, 140.00) | 138.00 (136.00, 140.00) | 138.00 (135.00, 141.00) | 138.00 (135.00, 141.00) | 0.008; **    |
| <b>Potassium (mmol/L)</b>                    | 4.30 (3.90, 4.70)       | 4.30 (4.00, 4.60)       | 4.20 (3.90, 4.60)       | 4.30 (4.00, 4.70)       | 4.30 (3.90, 4.70)       | 0.102        |
| <b>Calcium (mg/dL)</b>                       | 8.90 (8.40, 9.30)       | 9.00 (8.50, 9.40)       | 8.90 (8.50, 9.40)       | 8.80 (8.40, 9.30)       | 8.80 (8.30, 9.30)       | < 0.001; *** |
| <b>Creatinine (mg/dL)</b>                    | 1.00 (0.80, 1.50)       | 0.90 (0.80, 1.20)       | 1.00 (0.80, 1.40)       | 1.00 (0.80, 1.50)       | 1.20 (0.90, 2.10)       | < 0.001; *** |
| <b>Blood urea nitrogen (mg/dL)</b>           | 20.00 (14.00, 30.00)    | 17.00 (13.00, 24.00)    | 19.00 (14.00, 26.00)    | 20.50 (14.00, 32.00)    | 24.00 (14.00, 42.00)    | < 0.001; *** |
| <b>Bicarbonate (mmol/L)</b>                  | 26.00 (23.00, 28.00)    | 26.00 (24.00, 28.00)    | 26.00 (24.00, 28.00)    | 26.00 (24.00, 28.00)    | 26.00 (24.00, 28.00)    | 0.261        |
| <b>Chloride (mmol/L)</b>                     | 101.00 (98.00, 104.00)  | 100.00 (97.00, 103.00)  | 101.00 (98.00, 104.00)  | 101.00 (98.00, 104.00)  | 101.00 (97.00, 104.00)  | 0.004; **    |
| <b>Glucose (mg/dL)</b>                       | 124.00 (97.00, 186.00)  | 131.00 (99.00, 205.00)  | 121.00 (97.00, 190.50)  | 121.00 (96.00, 177.00)  | 124.00 (94.00, 175.25)  | 0.007; **    |
| <b>Hematocrit (g/dL)</b>                     | 36.30 (32.23, 40.10)    | 37.70 (34.60, 40.90)    | 37.00 (33.34, 40.70)    | 35.80 (31.98, 39.60)    | 34.20 (30.08, 38.50)    | < 0.001; *** |
| <b>Red blood cell (×10<sup>6</sup>/μL)</b>   | 4.06 ± 0.66             | 4.21 ± 0.58             | 4.13 ± 0.64             | 4.03 ± 0.65             | 3.89 ± 0.74             | < 0.001; *** |
| <b>Mean red blood cell volume (fL)</b>       | 89.00 (85.00, 93.00)    | 90.00 (86.00, 93.00)    | 90.00 (86.00, 93.00)    | 89.00 (84.00, 93.00)    | 89.00 (84.00, 95.00)    | 0.023; *     |
| <b>Mean corpuscular hemoglobin (pg)</b>      | 29.80 (28.10, 31.30)    | 30.30 (29.00, 31.50)    | 29.90 (28.50, 31.40)    | 29.45 (27.80, 31.10)    | 29.00 (26.90, 31.00)    | < 0.001; *** |
| <b>White blood cell (×10<sup>3</sup>/μL)</b> | 8.80 (6.90, 11.80)      | 9.00 (7.00, 11.70)      | 9.00 (7.00, 11.45)      | 8.70 (6.70, 12.10)      | 8.70 (6.80, 11.90)      | 0.937        |
| <b>Platelet (×10<sup>3</sup>/μL)</b>         | 258.00 (199.00, 332.00) | 266.00 (205.00, 333.00) | 261.00 (204.00, 332.00) | 251.50 (199.00, 326.23) | 253.00 (184.75, 338.75) | 0.097        |

(Continued)

**Table 1.** (Continued)

| Characteristics                                   | All                  | Q1                   | Q2                   | Q3                   | Q4                  | p-value      |
|---------------------------------------------------|----------------------|----------------------|----------------------|----------------------|---------------------|--------------|
| Hemoglobin (g/dL)                                 | 12.10 (10.60, 13.40) | 12.80 (11.50, 14.00) | 12.50 (11.10, 14.00) | 11.50 (10.40, 13.20) | 11.10 (9.60, 12.60) | < 0.001; *** |
| <b>Interventions (1<sup>st</sup> 24 h), n (%)</b> |                      |                      |                      |                      |                     |              |
| Mechanical ventilation                            | 205 (7.6)            | 18 (2.6)             | 38 (6.0)             | 50 (7.3)             | 99 (14.2)           | < 0.001; *** |
| Hemodialysis                                      | 192 (7.1)            | 8 (1.2)              | 19 (3.0)             | 46 (6.7)             | 119 (4.4)           | < 0.001; *** |
| Vasopressor administration                        | 392 (14.5)           | 38 (5.5)             | 62 (9.8)             | 94 (13.8)            | 198 (28.4)          | < 0.001; *** |
| <b>Clinical outcomes</b>                          |                      |                      |                      |                      |                     |              |
| Length of hospitalized stay, days                 | 7.79 (4.92, 12.88)   | 6.83 (4.25, 10.58)   | 7.17 (4.79, 11.79)   | 8.06 (5.13, 13.04)   | 9.04 (5.58, 17.34)  | < 0.001; *** |
| In-hospital mortality, n (%)                      | 106 (3.9)            | 2 (0.3)              | 12 (1.9)             | 17 (2.5)             | 75 (10.7)           | < 0.001; *** |
| 30-day post-admission mortality, n (%)            | 144 (5.3)            | 2 (0.3)              | 16 (2.5)             | 28 (4.1)             | 98 (14.0)           | < 0.001; *** |
| 90-day post-admission mortality, n (%)            | 288 (10.7)           | 12 (1.7)             | 39 (6.2)             | 67 (9.8)             | 170 (24.4)          | < 0.001; *** |

Data are expressed as mean  $\pm$  standard deviation, median (interquartile range), or number (%). Analysis of variance (or the Kruskal-Wallis test) and Chi-square (or Fisher's exact) tests were used for comparisons among groups. Statistical significance was set at  $p < 0.05$ . Red cell distribution width was grouped as follows: Q1: RDW  $\leq 13.5$ , Q2:  $13.5 < \text{RDW} \leq 14.6$ , Q3:  $14.6 < \text{RDW} \leq 16.1$ , Q4:  $16.1 < \text{RDW}$ .

\* $p < 0.05$ ;

\*\* $p < 0.01$ ;

\*\*\* $p < 0.001$ .

<https://doi.org/10.1371/journal.pone.0332211.t001>

(71.9%) were White, and the median hospital stay was 7.79 days. In-hospital, 30-day and 90-day post-admission mortality rates were 3.9%, 5.3% and 10.7%, respectively. The highest quartile RDW group was older, more often male, and had more comorbidities such as CHF, MI, chronic lung disease, rheumatic disease, and malignancy compared to all other groups. Importantly, the highest quartile RDW group had a longer length of stay, and significantly higher in-hospital, 30-day and 90-day post-admission mortality rates ( $p < 0.001$ ).

### RDW was an independent risk factor for in-hospital, 30-day post-admission, and 90-day post-admission all-cause mortality

According to Table 2, unadjusted RDW was significantly associated with in-hospital, 30-day post-admission, and 90-day post-admission all-cause mortality. After adjusting for confounders in the multivariate Cox regression, RDW remained associated with in-hospital all-cause mortality ( $p$ -values less than 0.05), 30-day post-admission all-cause mortality ( $p < 0.05$ ), and 90-day post-admission all-cause mortality ( $p < 0.05$ ).

### ROC analysis, RCS curves and Kaplan-Meier curves

We plotted the ROC curves for RDW and each all-cause mortality rate (Fig 2), which showed that RDW was significantly effective in predicting in-hospital all-cause mortality (AUC: 0.791, 95% CI: 0.750–0.832), 30-day post-admission all-cause mortality (AUC: 0.794, 95% CI: 0.760–0.829), and 90-day post-admission all-cause mortality (AUC: 0.760, 95%CI: 0.731–0.788). The RCS curve results (Fig 3) indicate a positive association between increasing RDW levels and a higher risk of all-cause mortality during hospitalization, as well as at 30 and 90 days post-admission. The Kaplan-Meier survival curves (Fig 4) showed significantly higher mortality rates in the high RDW group compared to the low RDW group at all observed time points: in-hospital, 30 days post-admission, and 90 days post-admission ( $p < 0.001$ ).



**Table 2. Multivariate Cox or logistic regression analyses for categorized RDW and clinical outcomes in patients with osteomyelitis.**

| Outcomes                        |    | Model 1               | p-value      | Model 2               | p-value      | Model 3             | p-value      |
|---------------------------------|----|-----------------------|--------------|-----------------------|--------------|---------------------|--------------|
| In-hospital mortality           | Q1 | Reference             | < 0.001; *** | Reference             | < 0.001; *** | Reference           | < 0.001; *** |
|                                 | Q2 | 6.62 (1.48, 29.69)    | 0.014; *     | 6.16 (1.37, 27.68)    | 0.018; *     | 4.64 (1.02, 21.05)  | 0.047; *     |
|                                 | Q3 | 8.76 (2.02, 38.04)    | 0.04; *      | 7.65 (1.76, 33.32)    | 0.007; **    | 4.51 (1.02, 19.97)  | 0.047; *     |
|                                 | Q4 | 41.23 (10.08, 168.62) | < 0.001; *** | 35.87 (8.75, 147.12)  | < 0.001; *** | 14.98 (3.56, 63.03) | < 0.001; *** |
| 30-day post-admission mortality | Q1 | Reference             | < 0.001; *** | Reference             | < 0.001; *** | Reference           | < 0.001; *** |
|                                 | Q2 | 8.78 (2.02, 38.17)    | 0.004; **    | 7.87 (1.81, 34.23)    | 0.006; **    | 6.42 (1.47, 27.96)  | 0.013; *     |
|                                 | Q3 | 14.35 (3.42, 60.24)   | < 0.001; *** | 11.69 (2.78, 49.12)   | < 0.001; *** | 7.99 (1.89, 33.76)  | 0.005; **    |
|                                 | Q4 | 51.91 (12.80, 210.50) | < 0.001; *** | 41.94 (10.33, 170.28) | < 0.001; *** | 22.53 (5.47, 92.87) | < 0.001; *** |
| 90-day post-admission mortality | Q1 | Reference             | < 0.001; *** | Reference             | < 0.001; *** | Reference           | < 0.001; *** |
|                                 | Q2 | 3.61 (1.89, 6.89)     | < 0.001; *** | 3.20 (1.68, 6.12)     | < 0.001; *** | 2.69 (1.41, 5.14)   | 0.003; **    |
|                                 | Q3 | 5.86 (3.17, 10.83)    | < 0.001; *** | 4.70 (2.54, 8.69)     | < 0.001; *** | 3.28 (1.76, 6.10)   | < 0.001; *** |
|                                 | Q4 | 16.00 (8.91, 28.73)   | < 0.001; *** | 12.84 (7.14, 23.09)   | < 0.001; *** | 7.18 (3.93, 13.14)  | < 0.001; *** |

Model results are shown as hazard ratios or odds ratios with 95% confidence intervals. Red cell distribution width was grouped as follows: Q1:  $\leq 13.5$ , Q2: 13.5–14.6, Q3: 14.6–16.1, Q4:  $> 16.1$ .

Model 1: Categorized red cell distribution width without adjustment.

Model 2: Model 1 adjusted by age, gender, race.

Model 3: Model 2 additionally adjusted for comorbidities (chronic heart failure, myocardial infarction, peripheral vascular disease, cerebrovascular disease, chronic pulmonary disease, rheumatic disease, peptic ulcer disease, paraplegia, diabetes, liver disease, cancer, renal disease) and interventions (mechanical ventilation, hemodialysis and vasopressor administration).

Statistical significance was set at  $p < 0.05$ .

\* $p < 0.05$ ;

\*\* $p < 0.01$ ;

\*\*\* $p < 0.001$ .

<https://doi.org/10.1371/journal.pone.0332211.t002>

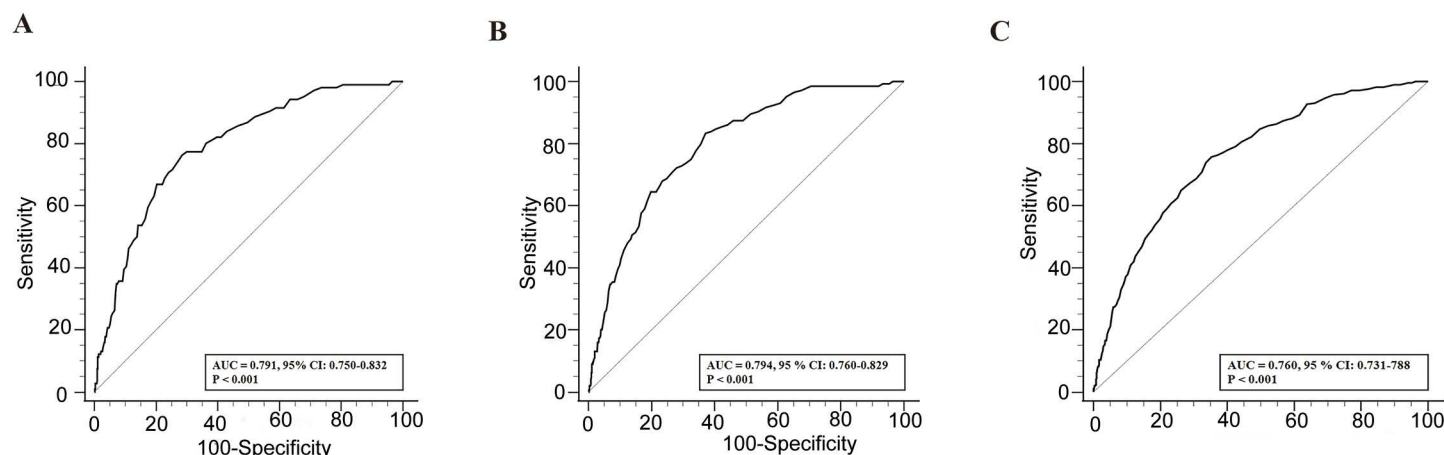

**Fig 2. ROC curves for RDW and each all-cause mortality rate. (A)** In-hospital all-cause mortality; **(B)**. 30-day post-admission all-cause mortality; **(C)**. 90-day post-admission all-cause mortality.

<https://doi.org/10.1371/journal.pone.0332211.g002>

## Subgroup analysis

Table 3 highlights the consistent association between RDW levels and all-cause mortality across different subgroups, including in-hospital, 30-day, and 90-day post-admission periods. When stratified by sex, CHF, diabetes, and myocardial

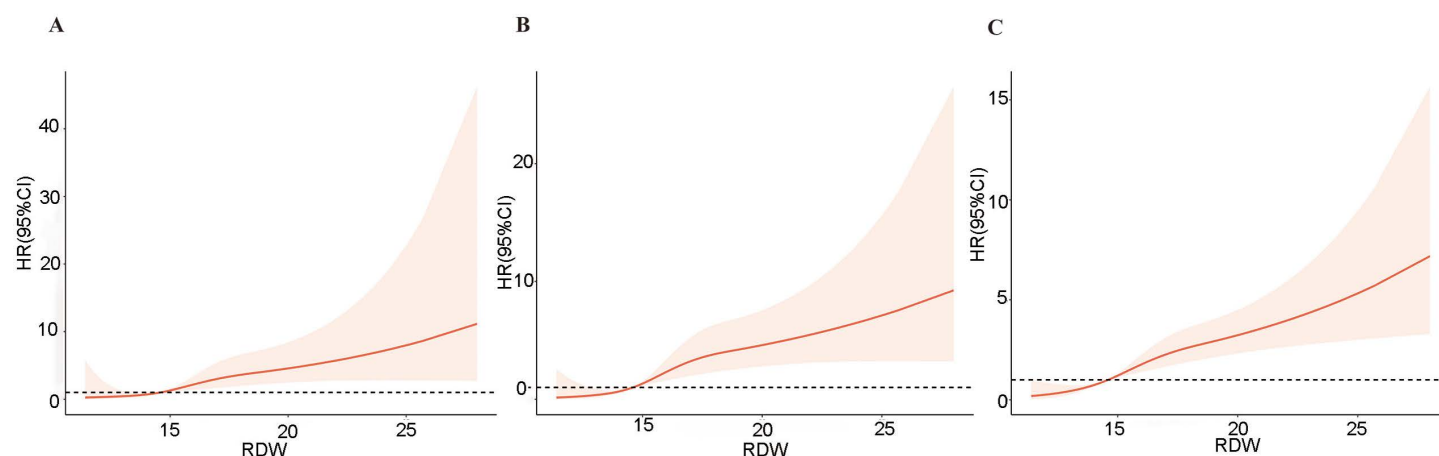

**Fig 3. The results of the RCS curve. (A)** In-hospital all-cause mortality; **(B)**. 30-day post-admission all-cause mortality; **(C)**. 90-day post-admission all-cause mortality.

<https://doi.org/10.1371/journal.pone.0332211.g003>

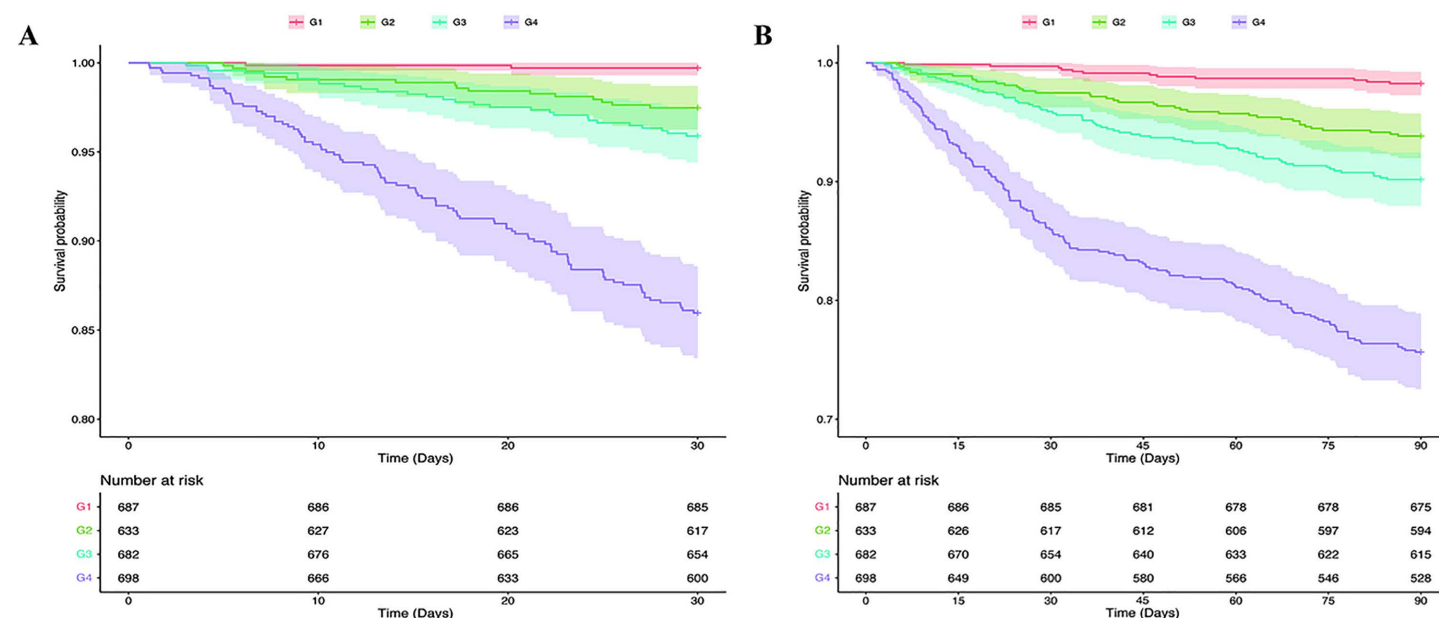

**Fig 4. The Kaplan-Meier survival analysis curve. (A)** The high RDW group; **(B)** The low RDW group.

<https://doi.org/10.1371/journal.pone.0332211.g004>

infarction, no significant interaction was observed between RDW and any subgroup ( $p$ : 0.254–0.920). In conclusion, RDW is an independent prognostic factor.

## Discussion

To the best of our knowledge, this retrospective observational study is the first to investigate the association between initial-day RDW levels and overall mortality in adult patients with osteomyelitis admitted to the ICU. Our findings suggest that RDW levels may serve as a reliable and independent predictive biomarker for overall mortality in ICU patients with



**Table 3. Multivariate Cox or logistic regression analyses for categorized RDW and clinical outcomes in patients with osteomyelitis in different subgroups according to the fully adjusted model (Model 3).**

| Subgroups       |    | Results [HR/OR, (95% CI), <i>P</i> value] |                                 |                                 |                                 |                                 |                                 |
|-----------------|----|-------------------------------------------|---------------------------------|---------------------------------|---------------------------------|---------------------------------|---------------------------------|
|                 |    | In-hospital mortality                     | <i>p</i> -value for interaction | 30-day post-admission mortality | <i>p</i> -value for interaction | 90-day post-admission mortality | <i>p</i> -value for interaction |
| Gender (male)   | Q1 | Reference                                 | 0.592                           | Reference                       | 0.915                           | Reference                       | 0.757                           |
|                 | Q2 | 4.17 (0.49, 35.80), 0.193                 |                                 | 8.96 (1.15, 69.76), 0.036       |                                 | 3.18 (1.37, 7.35), 0.007        |                                 |
|                 | Q3 | 5.70 (0.71, 45.47), 0.101                 |                                 | 10.25 (1.35, 77.68), 0.024      |                                 | 3.96 (1.76, 8.90), <0.001       |                                 |
|                 | Q4 | 18.74 (2.47, 142.30), 0.005               |                                 | 29.06 (3.93, 214.66), <0.001    |                                 | 8.19 (3.70, 18.13), <0.001      |                                 |
| Gender (female) | Q1 | Reference                                 | 0.254                           | Reference                       | 0.543                           | Reference                       | 0.872                           |
|                 | Q2 | 5.48 (0.64, 47.12), 0.122                 |                                 | 4.57 (0.53, 39.36), 0.166       |                                 | 2.42 (0.86, 6.83), 0.094        |                                 |
|                 | Q3 | 2.50 (0.28, 22.42), 0.413                 |                                 | 5.56 (0.70, 44.18), 0.105       |                                 | 2.60 (0.97, 6.96), 0.058        |                                 |
|                 | Q4 | 9.18 (1.18, 71.65), 0.034                 |                                 | 17.13 (2.30, 127.68), 0.006     |                                 | 6.61 (2.60, 16.79), <0.001      |                                 |
| CHF (-)         | Q1 | Reference                                 | 0.254                           | Reference                       | 0.543                           | Reference                       | 0.872                           |
|                 | Q2 | 4.41 (0.51, 38.45), 0.179                 |                                 | 8.04 (1.02, 63.65), 0.048       |                                 | 2.70 (1.21, 6.00), 0.015        |                                 |
|                 | Q3 | 6.51 (0.81, 52.68), 0.079                 |                                 | 12.84 (1.70, 97.15), 0.013      |                                 | 3.44 (1.59, 7.48), 0.002        |                                 |
|                 | Q4 | 19.68 (2.58, 150.34), 0.004               |                                 | 26.60 (3.58, 197.65), 0.001     |                                 | 7.22 (3.38, 15.42), <0.001      |                                 |
| CHF (+)         | Q1 | Reference                                 | 0.254                           | Reference                       | 0.543                           | Reference                       | 0.872                           |
|                 | Q2 | 4.10 (0.47, 35.59), 0.200                 |                                 | 4.25 (0.52, 34.65), 0.176       |                                 | 2.33 (0.76, 7.10), 0.137        |                                 |
|                 | Q3 | 2.04 (0.24, 17.35), 0.512                 |                                 | 3.40 (0.44, 26.47), 0.243       |                                 | 2.66 (0.93, 7.58), 0.068        |                                 |
|                 | Q4 | 7.26 (0.94, 56.04), 0.057                 |                                 | 11.86 (1.63, 86.55), 0.015      |                                 | 6.10 (2.22, 16.73), <0.001      |                                 |
| Diabetes (-)    | Q1 | Reference                                 | 0.823                           | Reference                       | 0.920                           | Reference                       | 0.433                           |
|                 | Q2 | 5.36 (0.63, 45.86), 0.126                 |                                 | 6.73 (0.84, 54.17), 0.073       |                                 | 2.57 (1.02, 6.47), 0.046        |                                 |
|                 | Q3 | 4.26 (0.50, 35.97), 0.184                 |                                 | 7.93 (1.03, 61.30), 0.047       |                                 | 2.89 (1.19, 7.05), 0.019        |                                 |
|                 | Q4 | 12.56 (1.62, 97.62), 0.016                |                                 | 22.31 (3.00, 165.70), 0.002     |                                 | 6.10 (2.56, 14.53), <0.001      |                                 |
| Diabetes (+)    | Q1 | Reference                                 | 0.823                           | Reference                       | 0.920                           | Reference                       | 0.433                           |
|                 | Q2 | 4.41 (0.51, 37.91), 0.177                 |                                 | 6.25 (0.78, 50.23), 0.085       |                                 | 2.81 (1.12, 7.02), 0.027        |                                 |
|                 | Q3 | 4.15 (0.51, 33.88), 0.184                 |                                 | 7.87 (1.03, 60.07), 0.047       |                                 | 3.56 (1.49, 8.51), 0.004        |                                 |
|                 | Q4 | 17.07 (2.24, 129.96), 0.006               |                                 | 23.49 (3.19, 172.89), 0.002     |                                 | 8.72 (3.76, 20.26), <0.001      |                                 |

(Continued)

Table 3. (Continued)

| Subgroups |    | Results [HR/OR, (95% CI), <i>P</i> value] |                                 |                                 |                                 |                                 |                                 |
|-----------|----|-------------------------------------------|---------------------------------|---------------------------------|---------------------------------|---------------------------------|---------------------------------|
|           |    | In-hospital mortality                     | <i>p</i> -value for interaction | 30-day post-admission mortality | <i>p</i> -value for interaction | 90-day post-admission mortality | <i>p</i> -value for interaction |
| MI (-)    | Q1 | Reference                                 | 0.357                           | Reference                       | 0.297                           | Reference                       | 0.576                           |
|           | Q2 | 7.65 (0.96, 61.30), 0.055                 |                                 | 9.26 (1.19, 71.91), 0.033       |                                 | 2.53 (1.27, 5.02), 0.008        |                                 |
|           | Q3 | 8.74 (1.13, 67.69), 0.038                 |                                 | 14.57 (1.96, 108.57), 0.009     |                                 | 3.22 (1.67, 6.20), <0.001       |                                 |
|           | Q4 | 25.40 (3.42, 188.71), 0.002               |                                 | 38.29 (5.25, 279.53), <0.001    |                                 | 6.56 (3.47, 12.41), <0.001      |                                 |
| MI (+)    | Q1 | Reference                                 |                                 | Reference                       |                                 | Reference                       |                                 |
|           | Q2 | 1.19 (0.11, 13.47), 0.887                 |                                 | 2.07 (0.23, 18.88), 0.518       |                                 | 3.32 (0.40, 27.56), 0.266       |                                 |
|           | Q3 | 1.02 (0.09, 11.23), 0.985                 |                                 | 2.26 (0.26, 19.98), 0.462       |                                 | 4.23 (0.54, 33.36), 0.171       |                                 |
|           | Q4 | 4.59 (0.51, 41.63), 0.176                 |                                 | 7.64 (0.98, 59.72), 0.053       |                                 | 13.65 (1.82, 102.51), 0.011     |                                 |

RDW was grouped as follows: Q1:  $\leq 13.5$ , Q2: 13.6–14.6, Q3: 14.7–16.1, Q4:  $> 16.1$ .

Model 3: Categorized red cell distribution width adjusted for age, gender, race, and comorbidities and interventions mentioned in the statistical analysis section.

Statistical significance was set at  $p < 0.05$ .

HR: Hazard Ratio; OR: Odds Ratio; CI: Confidence Interval; CHF: Congestive Heart Failure; MI: Myocardial Infarction.

<https://doi.org/10.1371/journal.pone.0332211.t003>

osteomyelitis. This association remained significant even after adjusting for potential confounding factors. Furthermore, our subgroup analysis revealed that RDW levels continued to predict all-cause mortality in ICU patients with osteomyelitis.

RDW is a measure of the degree of heterogeneity in red blood cell (RBC) volume [18]. Li et al. found a significant and independent positive correlation between RDW and inflammatory biomarkers, such as high-sensitivity C-reactive protein (hsCRP) and erythrocyte sedimentation rate (ESR) [21]. Several studies have identified that certain inflammatory cytokines (TNF- $\alpha$ , interleukin-1, IL-6, and interferon- $\gamma$  [INF- $\gamma$ ]) disrupt the response to erythropoietin, inhibit RBC production and lifespan, resulting in variations in RBC volume and subsequently elevated RDW [22–24]. Furthermore, inflammatory cytokines can impair iron metabolism, leading to irregular RBC size and shape, which contributes to elevated RDW levels [22,25].

Osteomyelitis is an inflammatory condition caused by the invasion of bone tissue by bacterial pathogens, with *Staphylococcus aureus* being the most common causative agent [26]. Among its virulence factors, *Staphylococcus aureus* produces  $\beta$ -hemolysin (Hlb), which reduces red blood cell count, and  $\alpha$ -toxin, which induces the production of inflammatory cytokines such as IFN- $\gamma$  [27]. It can be inferred that in osteomyelitis cases caused by *Staphylococcus aureus*, the resulting inflammatory response alters red blood cell quantity and size, thereby contributing to elevated RDW levels.

Although no previous studies have examined the relationship between RDW levels and all-cause mortality in osteomyelitis, associations between RDW and all-cause mortality have been reported in other diseases. In other bone-related diseases, Wang et al. reported that elevated RDW levels were significantly associated with mortality in elderly patients with hip fracture (HR: 1.03, 95% CI: 1.02 to 1.05,  $p < 0.0001$ , after adjustment) [28]. Similarly, a meta-analysis by Zhu et al. showed that RDW could serve as a predictor of mortality following hip fracture (HR: 3.14, 95% CI: 1.38 to 7.14,  $p < 0.001$ ) [29]. In the ICU setting, Deniz et al. demonstrated that elevated RDW levels ( $> 16.5\%$ ) were significantly associated with all-cause mortality in patients (OR: 3.27, 95% CI: 2.58 to 4.14,  $p < 0.001$ , after adjustment) [30].

This study fills a gap in the literature by demonstrating that RDW is a significant predictor of all-cause mortality in ICU patients with osteomyelitis.

The main strength of our study is that it demonstrates elevated RDW levels as a strong, independent predictor of all-cause mortality in critically ill patients with osteomyelitis. However, this study also has several limitations. Firstly, this was a retrospective study, and therefore, retrospective bias could not be avoided. Secondly, although we adjusted for a number of confounding variables and performed subgroup analyses, unmeasured confounders may still have influenced the results. Thirdly, this was a single-centre study, and thus, further rigorous prospective studies are needed to validate our conclusion. Fourthly, our study population was predominantly White, so whether these findings apply to other ethnic groups require further investigations. Fifthly, due to the limitation in the available literature and data, the relationship between anemia and RDW remains unclear, and further research is needed to explore this association. Given that RDW is commonly elevated in anemic states and that the Q4 group (with higher RDW) also exhibited lower hematocrit and hemoglobin levels along with a higher mean age, the presence of anemia in this subgroup is plausible. The lack of adjustment for anemia may have influenced the observed association between RDW and mortality. Future studies should incorporate anemia status as a covariate to further elucidate the independent prognostic value of RDW in this population. Finally, the variability of RDW cannot be definitively determined; it may fluctuate over time, and its stability remains uncertain. [31] Although current data indicate an association between RDW and osteomyelitis, further research is needed to clarify this relationship.

## Conclusion

A significant association between RDW and increased all-cause mortality has been observed in patients with osteomyelitis. These findings suggest that RDW may serve as a useful marker for identifying individuals at higher risk of mortality during hospitalization. However, further prospective studies are required to clarify the causal relationship and validate the clinical utility of RDW in this population.

## Supporting information

**S1 Table. The original data for analysis.**  
(XLSX)

## Author contributions

**Data curation:** Likai Liang, Zongyun He, Haibing Tao, Yang Chen.

**Formal analysis:** Likai Liang, Zhe Chen, Zongyun He, Haibing Tao, Yang Chen.

**Investigation:** Tao Liu.

**Methodology:** Likai Liang, Zhe Chen, Haibing Tao.

**Project administration:** Tao Liu.

**Resources:** Likai Liang, Zhe Chen, Yang Chen.

**Software:** Likai Liang, Zhe Chen, Haibing Tao, Yang Chen.

**Supervision:** Tao Liu.

**Validation:** Likai Liang, Zongyun He, Yang Chen.

**Visualization:** Zongyun He.

**Writing – original draft:** Likai Liang.

**Writing – review & editing:** Tao Liu, Zhe Chen, Zongyun He, Haibing Tao, Yang Chen.

## References

- Maffulli N, Papalia R, Zampogna B, Torre G, Albo E, Denaro V. The management of osteomyelitis in the adult. *Surgeon*. 2016;14(6):345–60. <https://doi.org/10.1016/j.surge.2015.12.005> PMID: 26805473
- Schmitt SK. Musculoskeletal Infections: Meeting the Challenge. *Infect Dis Clin North Am*. 2017;31(2):ix–x. <https://doi.org/10.1016/j.idc.2017.03.001> PMID: 28483046
- Yagdiran A, Otto-Lambertz C, Lingscheid KM, Sircar K, Samel C, Scheyerer MJ, et al. Quality of life and mortality after surgical treatment for vertebral osteomyelitis (VO): a prospective study. *Eur Spine J*. 2021;30(6):1721–31. <https://doi.org/10.1007/s00586-020-06519-z> PMID: 32613398
- Aagaard T, Roed C, Dahl B, Obel N. Long-term prognosis and causes of death after spondylodiscitis: A Danish nationwide cohort study. *Infect Dis (Lond)*. 2016;48(3):201–8. <https://doi.org/10.3109/23744235.2015.1103897> PMID: 26484577
- Gornitzky AL, Kim AE, O'Donnell JM, Swarup I. Diagnosis and Management of Osteomyelitis in Children: A Critical Analysis Review. *JBJS Rev*. 2020;8(6):e1900202. <https://doi.org/10.2106/JBJS.RVW.19.00202> PMID: 33006465
- Michail M, Jude E, Liaskos C, Karamagiolis S, Makrilakis K, Dimitroulis D, et al. The performance of serum inflammatory markers for the diagnosis and follow-up of patients with osteomyelitis. *Int J Low Extrem Wounds*. 2013;12(2):94–9. <https://doi.org/10.1177/1534734613486152> PMID: 23667102
- Van Asten SA, Nichols A, La Fontaine J, Bhavan K, Peters EJ, Lavery LA. The value of inflammatory markers to diagnose and monitor diabetic foot osteomyelitis. *Int Wound J*. 2017;14(1):40–5. <https://doi.org/10.1111/iwj.12545> PMID: 26634954
- Buttarelli M. Laboratory diagnosis of anemia: are the old and new red cell parameters useful in classification and treatment, how? *Int J Lab Hematol*. 2016;38 Suppl 1:123–32. <https://doi.org/10.1111/ijlh.12500> PMID: 27195903
- Eoh K-J, Lee T-K, Nam E-J, Kim S-W, Kim Y-T. Clinical Relevance of Red Blood Cell Distribution Width (RDW) in Endometrial Cancer: A Retrospective Single-Center Experience from Korea. *Cancers (Basel)*. 2023;15(15):3984. <https://doi.org/10.3390/cancers15153984> PMID: 37568799
- Li N, Zhou H, Tang Q. Red Blood Cell Distribution Width: A Novel Predictive Indicator for Cardiovascular and Cerebrovascular Diseases. *Dis Markers*. 2017;2017:7089493. <https://doi.org/10.1155/2017/7089493> PMID: 29038615
- Owoicho O, Tapela K, Olwal CO, Djomkam Zune AL, Nganyewo NN, Quaye O. Red blood cell distribution width as a prognostic biomarker for viral infections: prospects and challenges. *Biomark Med*. 2022;16(1):41–50. <https://doi.org/10.2217/bmm-2021-0364> PMID: 34784758
- Aulakh R, Sohi I, Singh T, Kakkar N. Red cell distribution width (RDW) in the diagnosis of iron deficiency with microcytic hypochromic anemia. *Indian J Pediatr*. 2009;76(3):265–8. <https://doi.org/10.1007/s12098-009-0014-4> PMID: 19205647
- Mutlu NM, Peker TT, Soyol ÖB, Akçaboy ZN, Akçaboy EY, Titiz AP, et al. Red Cell Distribution Width in Diagnosis of Brain Death. *Transplant Proc*. 2019;51(7):2189–91. <https://doi.org/10.1016/j.transproceed.2019.04.072> PMID: 31371213
- Montagnana M, Danese E. Red cell distribution width and cancer. *Ann Transl Med*. 2016;4(20):399. <https://doi.org/10.21037/atm.2016.10.50> PMID: 27867951
- Liu S, Zhang H, Zhu P, Chen S, Lan Z. Predictive role of red blood cell distribution width and hemoglobin-to-red blood cell distribution width ratio for mortality in patients with COPD: evidence from NHANES 1999–2018. *BMC Pulm Med*. 2024;24(1):413. <https://doi.org/10.1186/s12890-024-03229-w> PMID: 39187816
- Li X, Xu H, Gao P. Increased red cell distribution width predicts severity of drug-induced liver injury: a retrospective study. *Sci Rep*. 2021;11(1):773. <https://doi.org/10.1038/s41598-020-80116-4> PMID: 33436893
- Tao Y, Zhou Y, Chen H, Qin Y, He X, Liu P, et al. Prognostic role of red blood cell distribution width and platelet/lymphocyte ratio in early-stage classical Hodgkin lymphoma. *Future Oncol*. 2022;18(15):1817–27. <https://doi.org/10.2217/fon-2021-1398> PMID: 35179068
- Salvagno GL, Sanchis-Gomar F, Picanza A, Lippi G. Red blood cell distribution width: A simple parameter with multiple clinical applications. *Crit Rev Clin Lab Sci*. 2015;52(2):86–105. <https://doi.org/10.3109/10408363.2014.992064> PMID: 25535770
- Szygula-Jurkiewicz B, Szczurek W, Skrzypek M, Nadziakiewicz P, Siedlecki L, Zakliczynski M, et al. Red Blood Cell Distribution Width in End-Stage Heart Failure Patients Is Independently Associated With All-Cause Mortality After Orthotopic Heart Transplantation. *Transplant Proc*. 2018;50(7):2095–9. <https://doi.org/10.1016/j.transproceed.2018.02.141> PMID: 30177116
- Perlstein TS, Weuve J, Pfeffer MA, Beckman JA. Red blood cell distribution width and mortality risk in a community-based prospective cohort. *Arch Intern Med*. 2009;169(6):588–94. <https://doi.org/10.1001/archinternmed.2009.55> PMID: 19307522
- Lippi G, Targher G, Montagnana M, Salvagno GL, Zoppini G, Guidi GC. Relation between red blood cell distribution width and inflammatory biomarkers in a large cohort of unselected outpatients. *Arch Pathol Lab Med*. 2009;133(4):628–32. <https://doi.org/10.5858/133.4.628> PMID: 19391664
- Ganz T. Anemia of Inflammation. *N Engl J Med*. 2019;381(12):1148–57. <https://doi.org/10.1056/NEJMr1804281> PMID: 31532961
- Kario K, Matsuo T, Nakao K, Yamaguchi N. The correlation between red cell distribution width and serum erythropoietin titres. *Clin Lab Haematol*. 1991;13(2):222–3. <https://doi.org/10.1111/j.1365-2257.1991.tb00274.x> PMID: 1934934
- Jelkmann W. Proinflammatory cytokines lowering erythropoietin production. *J Interferon Cytokine Res*. 1998;18(8):555–9. <https://doi.org/10.1089/jir.1998.18.555> PMID: 9726435
- Yang Y, Wang Q, Gao L, Liu S, Zhao J, Liu G, et al. Promising applications of red cell distribution width in diagnosis and prognosis of diseases with or without disordered iron metabolism. *Cell Biol Int*. 2023;47(7):1161–9. <https://doi.org/10.1002/cbin.12029> PMID: 37092585

26. Urish KL, Cassat JE. Staphylococcus aureus Osteomyelitis: Bone, Bugs, and Surgery. *Infect Immun*. 2020;88(7):e00932-19. <https://doi.org/10.1128/IAI.00932-19> PMID: [32094258](https://pubmed.ncbi.nlm.nih.gov/32094258/)
27. Chen H, Zhang J, He Y, Lv Z, Liang Z, Chen J, et al. Exploring the Role of Staphylococcus aureus in Inflammatory Diseases. *Toxins (Basel)*. 2022;14(7):464. <https://doi.org/10.3390/toxins14070464> PMID: [35878202](https://pubmed.ncbi.nlm.nih.gov/35878202/)
28. Wang N-J, Zhang Y-M, Zhang B-F. The Association Between Red Cell Distribution Width (RDW) and All-Cause Mortality in Elderly Patients with Hip Fractures: A Retrospective Cohort Study. *Int J Gen Med*. 2023;16:3555–66. <https://doi.org/10.2147/IJGM.S417079> PMID: [37609519](https://pubmed.ncbi.nlm.nih.gov/37609519/)
29. Zhu X-F, Weng H-Y, Huang S-F. Red cell distribution width as a predictor of mortality after hip fracture: a systematic review and meta-analysis. *Eur Rev Med Pharmacol Sci*. 2023;27(15):6996–7004. [https://doi.org/10.26355/eurrev\\_202308\\_33271](https://doi.org/10.26355/eurrev_202308_33271) PMID: [37606108](https://pubmed.ncbi.nlm.nih.gov/37606108/)
30. Deniz M, Ozgun P, Ozdemir E. Relationships between RDW, NLR, CAR, and APACHE II scores in the context of predicting the prognosis and mortality in ICU patients. *Eur Rev Med Pharmacol Sci*. 2022;26(12):4258–67. [https://doi.org/10.26355/eurrev\\_202206\\_29063](https://doi.org/10.26355/eurrev_202206_29063) PMID: [35776025](https://pubmed.ncbi.nlm.nih.gov/35776025/)
31. Dugdale AE, Badrick T. Red blood cell distribution width (RDW)—a mechanism for normal variation and changes in pathological states. *J Lab Precis Med*. 2018;3:73–73. <https://doi.org/10.21037/jlpm.2018.08.03>
